# Supplementary material
Source: Springer Nature journal article supplement (https://www.springermedizin.de/resource/supplementary/12877_2008_162_MOESM6_ESM.pdf/9441302)
Supplement: MOESM6 [file 9441302]

Elderly residents at 32 nursing homes  
n = 1187

Not included (n = 436)  
Away when the study took place n=8  
Substantial incontinence n=291  
Urinary indwelling catheter n=96  
Ongoing dialysis n=1  
Unknown reason n=40

Eligible patients fulfilling inclusion criteria n = 751

Excluded patients (n = 96)  
Refused participation n=96

Conclusive results (n = 651)  
Gold standard (urinary culture) n=651  
Visual nitrite dipstick n=650  
Analyzer nitrite dipstick n=643  
Visual leukocyte esterase dipstick n=630  
Analyzer leukocyte esterase dipstick n=642

Inconclusive results (n = 4)  
Data accidentally lost n=3  
Accidentally two urinary cultures were  
taken showing different results n=1
